# Supplementary material
Source: PubMed Central journal article supplement (PMC6410368)
Supplement: NIHMS1007590-supplement-Sup_Figures.pdf [file NIHMS1007590-supplement-Sup_Figures.pdf]

## Supplementary Materials for

### **Mitophagy controls beige adipocyte maintenance through a Parkin-dependent and UCP1-independent mechanism**

Xiaodan Lu, Svetlana Altshuler-Keylin, Qiang Wang, Yong Chen,  
Carlos Henrique Sponton, Kenji Ikeda, Pema Maretich, Takeshi Yoneshiro,  
Shingo Kajimura\*

\*Corresponding author. Email: shingo.kajimura@ucsf.edu

Published 24 April 2018, *Sci. Signal.* **11**, eaap8526 (2018)

DOI: 10.1126/scisignal.aap8526

#### **This PDF file includes:**

- Fig. S1. Validation of mitophagy monitoring in *mt-Keima* mice.
- Fig. S2. Genetic requirement of Parkin for beige adipocyte maintenance in vivo.
- Fig. S3. Analyses of the iBAT of *Ucp1* KO mice after  $\beta_3$ -AR agonist withdrawal.
- Fig. S4. Regulation of Parkin recruitment to the mitochondria by the PKA signaling pathway.
- Table S1. Oligonucleotide sequences of quantitative RT-PCR primers.

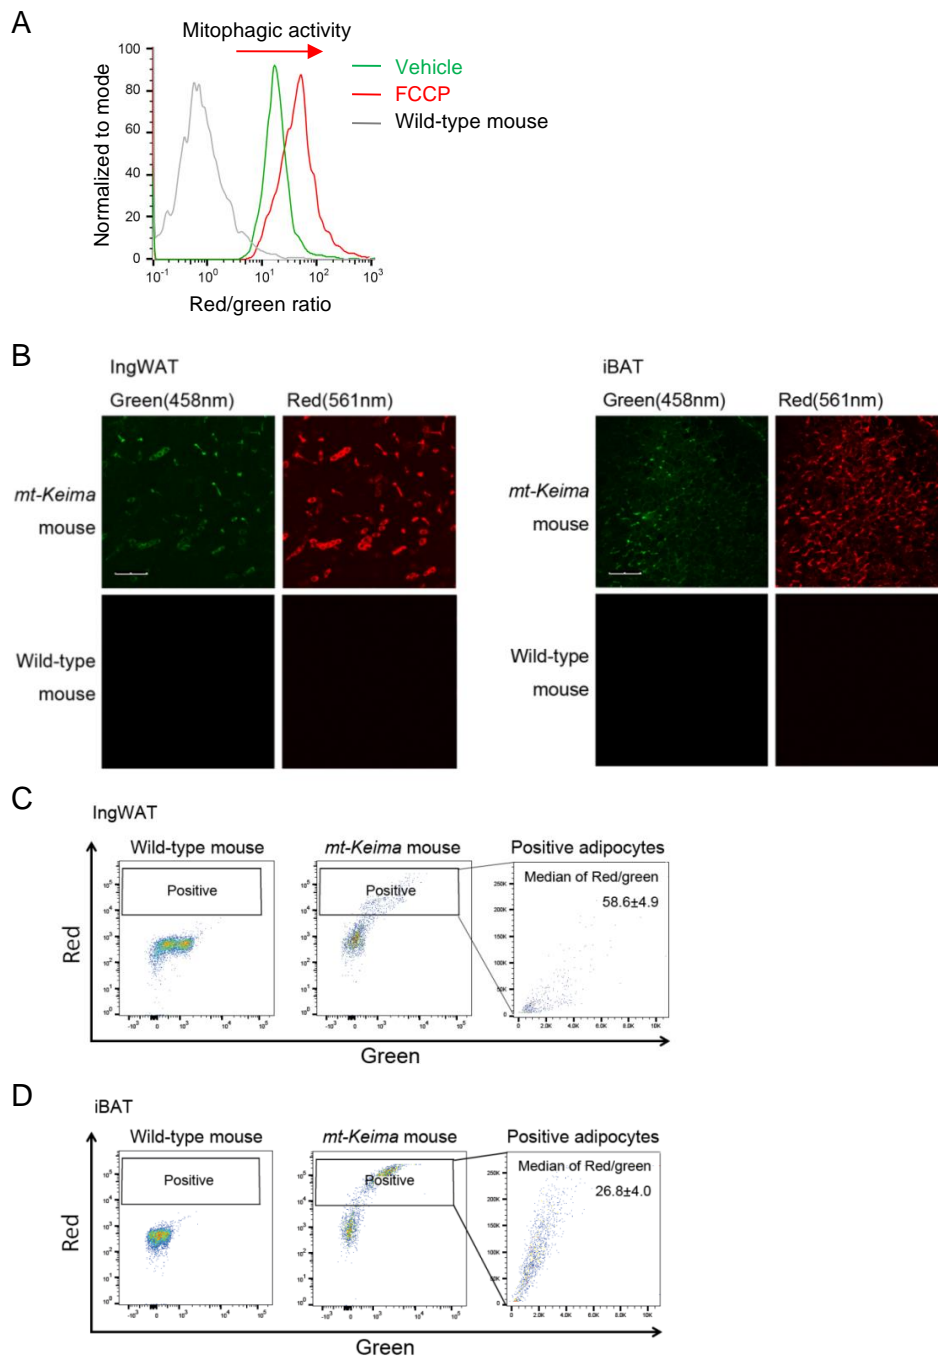

**Supplementary Figure 1. Validation of mitophagy monitoring in *mt-Keima* mice.**

- (A) Mature adipocytes were isolated from the inguinal white adipose tissue of *mt-Keima* mice or wild-type mice (gray) as a negative control. Vehicle (green) or FCCP at 10  $\mu$ M (red) were added to the isolated adipocytes. Signals from green (458nm) and red (561nm) channels were detected by flow cytometry. n=3 mice per group.
- (B) Confocal images of green (458nm) and red (561nm) fluorescence in inguinal WAT (left) and interscapular BAT (right) from *mt-Keima* mice. Adipose tissues from wild-type mice were included as a negative control. Scale bars, 100  $\mu$ m.
- (C) Mature adipocytes were isolated from the inguinal WAT from *mt-Keima* mice or wild-type control mice.
- (D) Mature adipocytes were isolated from the interscapular BAT from *mt-Keima* mice or wild-type control mice.

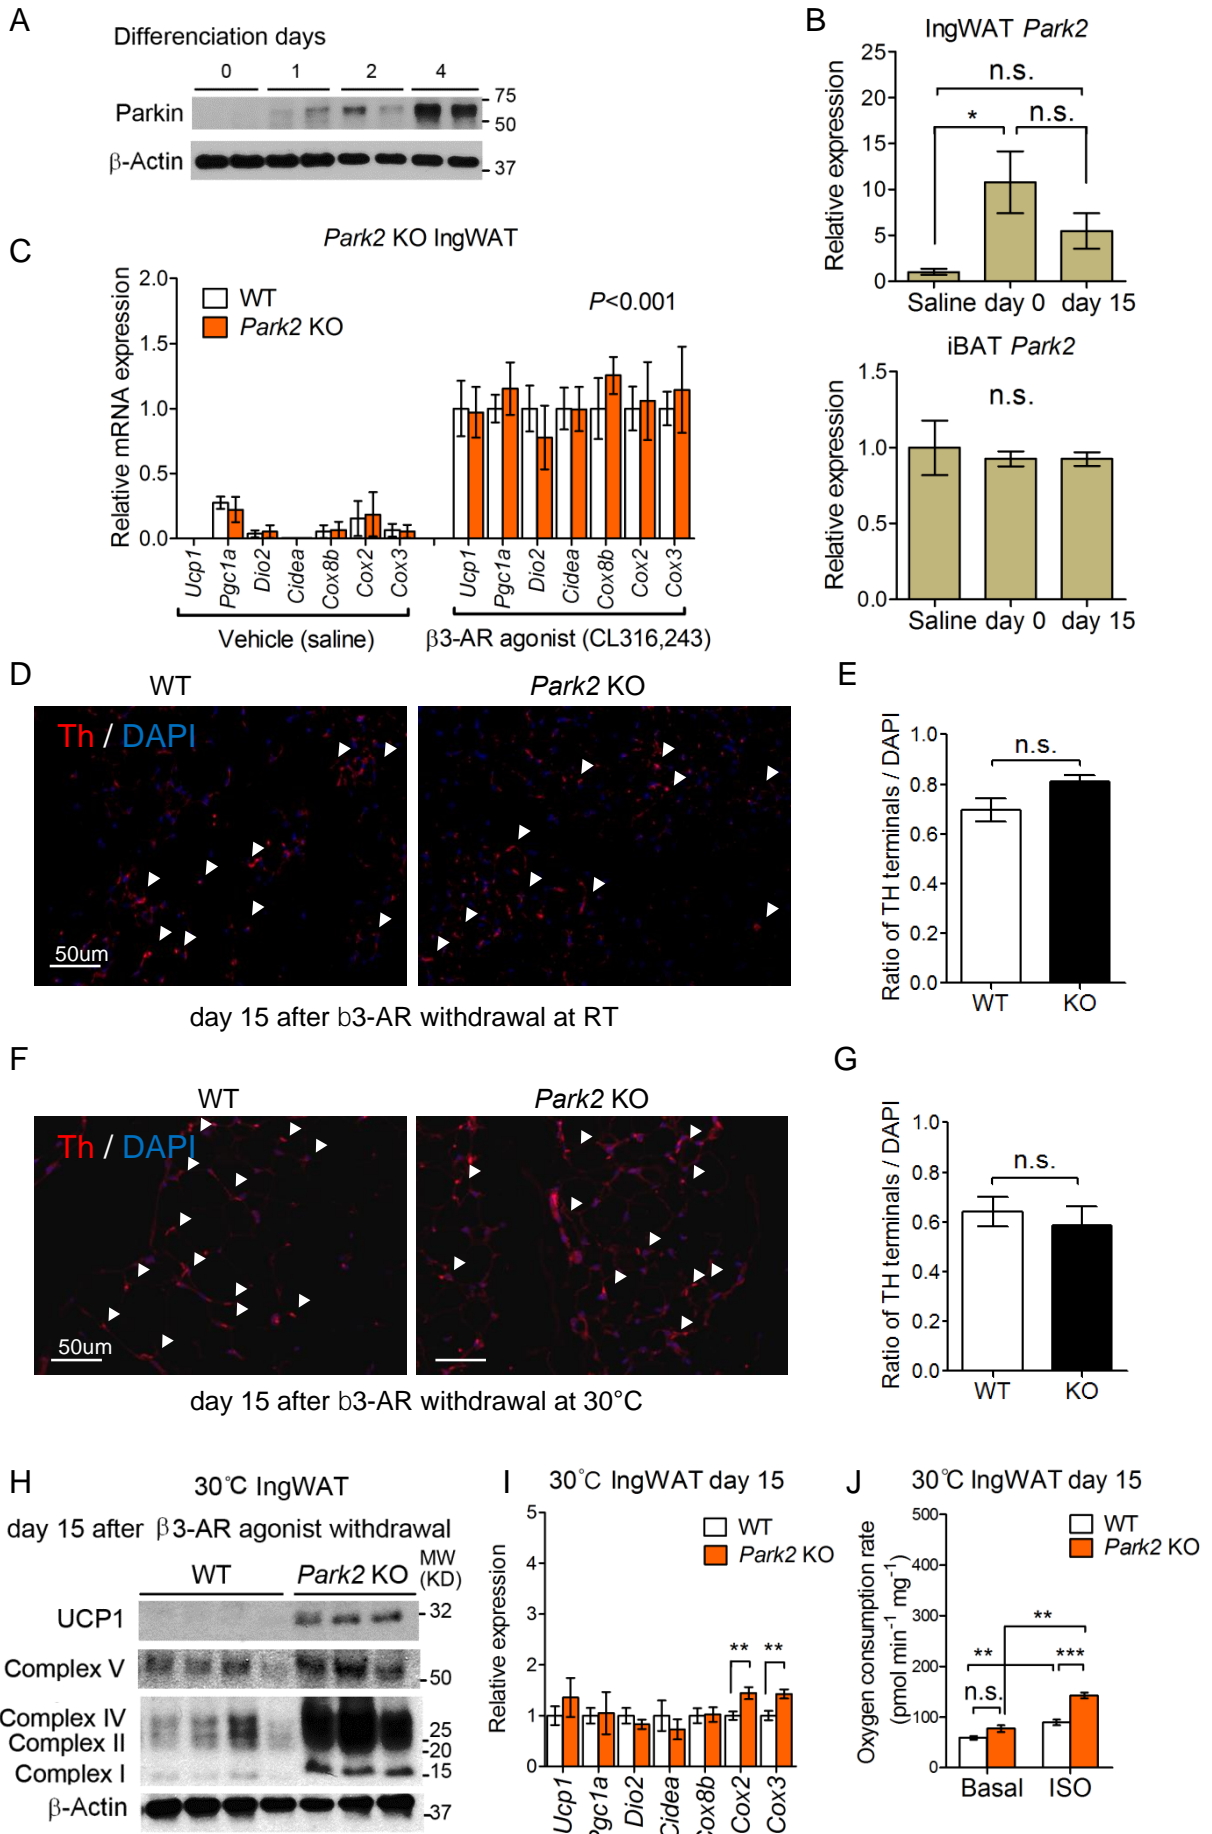

## Supplementary Figure 2. Genetic requirement of Parkin for beige adipocyte maintenance in vivo.

- (A) Wild-type mouse pre-adipocytes were differentiated in culture. Parkin protein expression was detected by immunoblotting in total cell lysates collected at day 0, day 1, day 2, and day 4 of differentiation.  $\beta$ -actin was used as a loading control. The molecular weight (MW) is shown on the right.  $n=2$  wells of cell samples per group. Data are representative of three independent experiments.
- (B) Relative mRNA level of *Park2* in the inguinal WAT and the interscapular BAT from control and *Park2* KO mice at day 0 and day 15 following  $\beta$ 3-AR agonist withdrawal.  $*P<0.05$  by one-way ANOVA with post hoc test by Tukey's method. n.s., not significant.  $n=3-4$  mice per group. Data are presented as mean  $\pm$  s.e.m.
- (C) Relative mRNA levels of thermogenic genes (as indicated) in the inguinal WAT of control and *Park2* KO mice.  $***P<0.001$  by two-way ANOVA with post hoc test by Tukey's method between  $\beta$ 3-AR agonist-treated group and vehicle-treated group.  $n=3-4$  mice per group. Data are presented as mean  $\pm$  s.e.m.
- (D) Immunohistochemistry staining of tyrosine hydroxylase (TH) in the inguinal WAT of WT and *Park2* KO mice at day 15 following  $\beta$ 3-AR agonist withdrawal under ambient temperature (RT). DAPI staining was performed to visualize the nucleus. Scale bar, 50  $\mu$ m.
- (E) Quantification of TH-positive cells in (D). n.s., not significant by unpaired Student's *t*-test.  $n=4$  mice per group. Data are presented as mean  $\pm$  s.e.m.
- (F) Immunohistochemistry staining of TH in the inguinal WAT of WT and *Park2* KO mice at day 15 following  $\beta$ 3-AR agonist withdrawal at thermoneutrality (30°C). DAPI staining was performed to visualize the nucleus. Scale bar, 50  $\mu$ m.
- (G) Quantification of TH-positive cells in (D). n.s., not significant by unpaired Student's *t*-test.  $n=4$  mice per group. Data are presented as mean  $\pm$  s.e.m.
- (H) Representative immunoblotting for UCP1 and mitochondrial complexes (as indicated) in the inguinal WAT of control and *Park2* KO mice treated with the  $\beta$ 3-AR agonist CL316,243 at day 15 at thermoneutrality (30°C).  $\beta$ -actin was used as a loading control. The molecular weight (MW) is shown on the right.  $n=3-4$  mice per group.
- (I) Relative mRNA expression of thermogenic genes (as indicated) in the inguinal WAT of control and *Park2* KO mice treated with CL316,243 at day 15 under thermoneutrality (30°C).  $**P<0.01$  by unpaired Student's *t*-test.  $n=7-8$  mice per group. n.s., not significant. Data are presented as mean  $\pm$  s.e.m.
- (J) OCR in the inguinal WAT of control and *Park2* KO mice at day 15 following  $\beta$ 3-AR agonist withdrawal under thermoneutrality (30°C). OCR data were shown per 1 mg of tissue. Tissues were treated with isoproterenol (ISO) or vehicle (basal).  $**P<0.01$ ,  $***P<0.001$  by two-way ANOVA with post hoc test by paired or unpaired Student's *t*-test.  $n=4$  mice per group. n.s., not significant. Data are presented as mean  $\pm$  s.e.m.

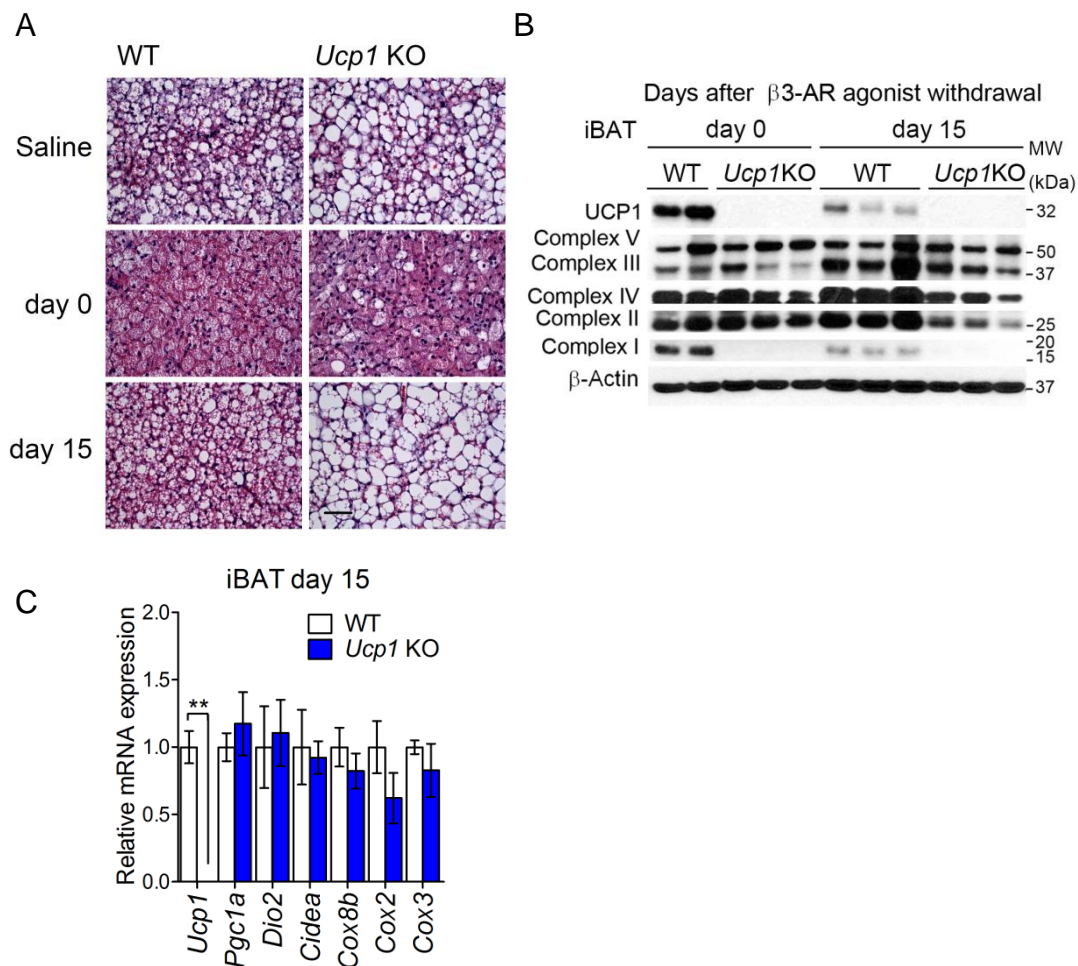

**Supplementary Figure 3. Analyses of the iBAT of *Ucp1* KO mice after  $\beta$ <sub>3</sub>-AR agonist withdrawal.**

- (A) Hematoxylin and eosin (H & E) staining of the interscapular BAT of control and *Ucp1* KO mice treated with vehicle (saline) or CL316,243 at day 0 and day 15 following  $\beta$ 3-AR agonist withdrawal. n=3 mice per group. Scale bars, 100 $\mu$ m.
- (B) Representative immunoblotting for UCP1 and mitochondrial complexes (as indicated) in the interscapular BAT of control and *Ucp1* KO mice treated with CL316,243 at day 0 and day 15 following  $\beta$ 3-AR agonist withdrawal.  $\beta$ -actin was used as a loading control. The molecular weight (MW) is shown on the right. Data are representative of three independent experiments.
- (C) Relative mRNA expression of indicated genes in the interscapular BAT of control and *Ucp1* KO mice treated with CL316,243 at day 15 following  $\beta$ 3-AR agonist withdrawal. n=3 mice per group. \*\* $P$ <0.01 by unpaired Student's *t*-test. n.s., not significant. Data are expressed as mean  $\pm$  s.e.m.

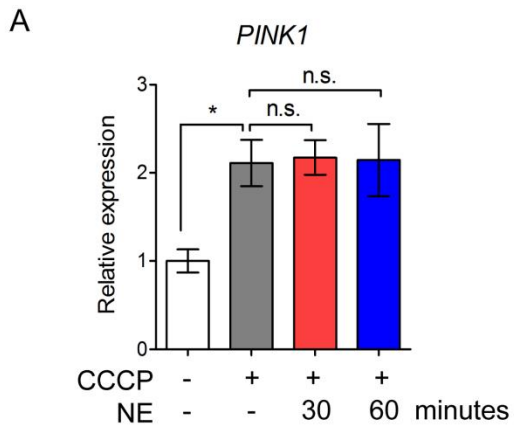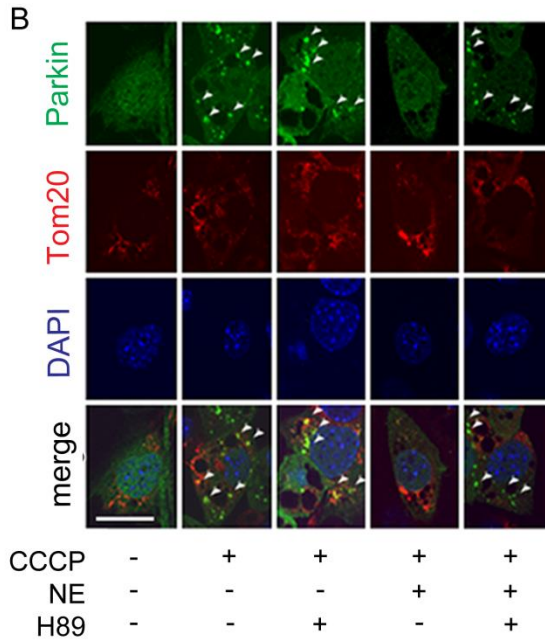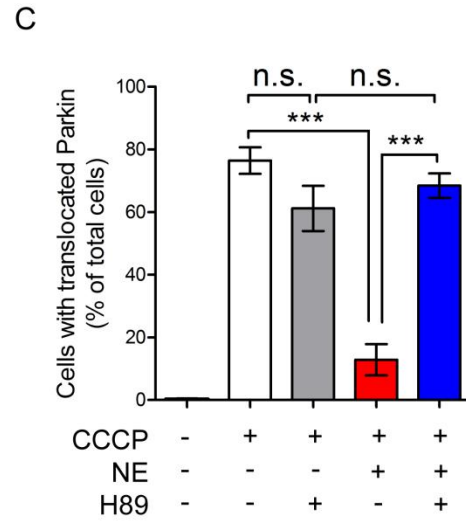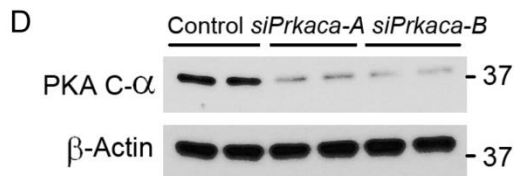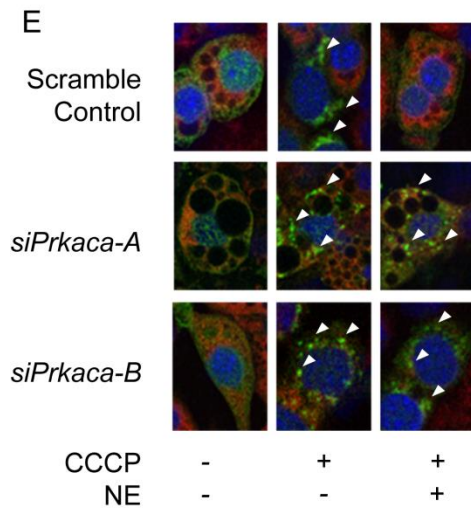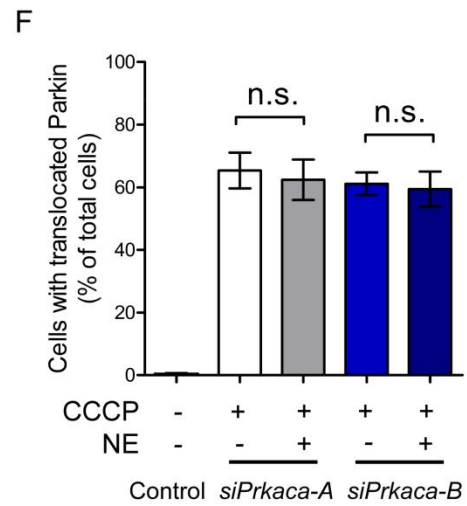

**Supplementary Figure 4. Regulation of Parkin recruitment to the mitochondria by the PKA signaling pathway.**

- (A) Relative mRNA expression of *Pink1* in beige adipocytes. Cells were treated with vehicle or norepinephrine (NE) for 30 or 60 minutes followed by CCCP treatment. \* $P < 0.05$  by one-way ANOVA with post hoc test by unpaired Student's *t*-test.  $n = 3$  wells of cell samples per group. Data are presented as mean  $\pm$  s.e.m.
- (B) YFP-Parkin was expressed in mouse beige adipocytes. Differentiated adipocytes were pretreated with a PKA inhibitor (H89) or vehicle for 1 hour. Subsequently, cells were treated with CCCP and/or NE. Mitochondria were stained with the Tom20 antibody (red) and nuclei with DAPI (blue). YFP-Parkin localization to the mitochondria was analyzed by confocal microscopy. Scale bars, 20  $\mu$ m. Arrowheads indicate the punctae of YFP-Parkin recruited to the mitochondria.
- (C) Quantification of Parkin localization in the mitochondria in (B). \*\*\* $P < 0.001$  by one-way ANOVA with post hoc test by Tukey's method. n.s., not significant. 412 cells were analyzed for each experimental group. Data are represented as mean  $\pm$  s.e.m. The study was repeated in three independent experiments.
- (D) siRNA of *Prkaca* (*siPrkaca-A* and *siPrkaca-B*) or scramble control siRNA (Control) were transfected to the beige cells expressing YFP-Parkin. PKA C- $\alpha$  protein expression was detected by immunoblotting.  $\beta$ -actin was used as a loading control. Molecular weight (MW) is shown on the right. The study was repeated in three independent experiments.
- (E) Cells in (D) were treated with CCCP and/or NE. YFP-Parkin localization to the mitochondria was analyzed by confocal microscopy. Scale bars, 20  $\mu$ m. Arrowheads indicate the punctae of YFP-Parkin localization to mitochondria.
- (F) Quantification of Parkin localization in the mitochondria in (E). n.s., not significant, by one-way ANOVA with post hoc test by Tukey's method. 476 cells were analyzed for each experimental group. Data are presented as mean  $\pm$  s.e.m. The study was repeated in three independent experiments.

**Supplementary Table 1. Oligonucleotide sequences of quantitative RT-PCR primers.**

| <b>Gene Name</b>               | <b>Forward</b>          | <b>Reverse</b>             |
|--------------------------------|-------------------------|----------------------------|
| <i>Park2</i>                   | GGGATTCAGAAGCAGCCAGA    | CCCACTGAACTCGGAGCTT        |
| <i>Ucp1</i>                    | CACCTTCCCGCTGGACACT     | CCCTAGGACACCTTTATACCTAATGG |
| <i>Pgc1<math>\alpha</math></i> | AGCCGTGACCACTGACAACGAG  | GCTGCATGGTTCTGAGTGCTAAG    |
| <i>Dio2</i>                    | CAGTGTGGTGCACGTCTCCAATC | TGAACCAAAGTTGACCACCAG      |
| <i>Cidea</i>                   | ATCACAACTGGCCTGGTTACG   | TACTACCCGGTGTCCATTTCT      |
| <i>Cox8b</i>                   | GAACCATGAAGCCAACGACT    | GCGAAGTTCACAGTGGTTCC       |
| <i>Cox2</i>                    | ACCTGGTGAAC TACGACTGCT  | CCTAGGGAGGGGACTGCTCA       |
| <i>Cox3</i>                    | CTTCACCATCCTCCAAGCTTCA  | AGTCCATGGAATCCAGTAGCCAT    |
| <i>Prkaca</i>                  | CCACTACGCCATGAAGATCT    | ACCTGTACATGGTCATGGAG       |
| <i>Pink1</i>                   | GTCAGGAGATCCAGGCAATT    | CATTGGCAAGGGTTGCAATG       |
